# Supplementary material for: Outcome measurement in functional neurological disorder: a systematic review and recommendations
Source: PubMed Central journal article supplement — J Neurol Neurosurg Psychiatry. 2020 Feb 28;91(6):638–49. doi: 10.1136/jnnp-2019-322180 (PMC7279198; doi:10.1136/jnnp-2019-322180), 2020-02-28
Supplement: jnnp-2019-322180supp003.pdf [file jnnp-2019-322180supp003.pdf]

## Supplementary File 2: Measurement properties of existing FND-specific outcome measures

| Measure                                                   | Validation sample      | Measurement properties                                                                                                                                                           |                                                                |                                                                                                                                                      |                                                                                                                                                                                                     |                                                                                                                                                                                                              |
|-----------------------------------------------------------|------------------------|----------------------------------------------------------------------------------------------------------------------------------------------------------------------------------|----------------------------------------------------------------|------------------------------------------------------------------------------------------------------------------------------------------------------|-----------------------------------------------------------------------------------------------------------------------------------------------------------------------------------------------------|--------------------------------------------------------------------------------------------------------------------------------------------------------------------------------------------------------------|
|                                                           |                        | Inter-rater reliability                                                                                                                                                          | Internal consistency                                           | Convergent validity                                                                                                                                  | Responsiveness                                                                                                                                                                                      | Known groups validity                                                                                                                                                                                        |
| <b>Rating scale for functional seizures (Cianci 2011)</b> | Seizures = 60          | n = 3:<br><ul style="list-style-type: none"> <li>0.65-1 ACI presence / absence of phenomena</li> <li>0.53-0.71 KCC Total scores</li> <li>0.51-0.56 ICC Total scores</li> </ul>   |                                                                | Total seizure/CGI scores:<br><ul style="list-style-type: none"> <li><math>r_s = 0.69</math></li> <li><math>p &lt; 0.001</math></li> </ul>            |                                                                                                                                                                                                     |                                                                                                                                                                                                              |
| <b>PMDRS (Hinson 2005)</b>                                | FMD = 87               | n = 3:<br><ul style="list-style-type: none"> <li>0.63-0.86 GK presence / absence of phenomena</li> <li>0.91-0.93 KCC Total scores</li> <li>0.87-0.89 ICC Total scores</li> </ul> |                                                                | $r_s = 0.79$ Total PMD / CGI scores                                                                                                                  | Before / after treatment:<br><ul style="list-style-type: none"> <li>Mean Total PMD scores 71.2 – 29</li> <li>Mean Total function scores 7.4 - 2.1</li> <li>both <math>p &lt; 0.05</math></li> </ul> |                                                                                                                                                                                                              |
| <b>CDS-R (ijaz 2017)</b>                                  | FND = 120;<br>HC = 120 |                                                                                                                                                                                  | Cronbach's $\alpha$ :<br>0.61-0.85 CDS-R Total and 5 subscales | $r = 0.81$ CDS-R Total and CSI-24 scores                                                                                                             |                                                                                                                                                                                                     | Mean CDS-R scores:<br><ul style="list-style-type: none"> <li>FND = 34.1</li> <li>control group = 16.2, <math>p = 0.001</math></li> </ul><br>76% FND patients correctly identified with clinical cut-off (19) |
| <b>S-FMDRS (Nielsen 2017a)</b>                            | FMD = 52               | n = 3:<br><ul style="list-style-type: none"> <li>0.85 ICC S-FMDRS Total score</li> <li>0.36-0.63 LK presence / absence</li> </ul>                                                |                                                                | S-FMDRS and PMDRS Total scores:<br><ul style="list-style-type: none"> <li><math>r_s = 0.84-0.95</math></li> <li><math>p &lt; 0.001</math></li> </ul> | Mean S-FMDRS scores:<br><ul style="list-style-type: none"> <li>intervention = 10.6</li> <li>control group = 16.6</li> </ul> Cohen's $d = 0.79$                                                      |                                                                                                                                                                                                              |

|                                                                                                                                                                                                                                                                                                                                                                                                                                                                                                                                                                                                              |                      |                                                                                                                                             |                                                                                                                                                                                                                        |
|--------------------------------------------------------------------------------------------------------------------------------------------------------------------------------------------------------------------------------------------------------------------------------------------------------------------------------------------------------------------------------------------------------------------------------------------------------------------------------------------------------------------------------------------------------------------------------------------------------------|----------------------|---------------------------------------------------------------------------------------------------------------------------------------------|------------------------------------------------------------------------------------------------------------------------------------------------------------------------------------------------------------------------|
|                                                                                                                                                                                                                                                                                                                                                                                                                                                                                                                                                                                                              |                      | phenomena in individual regions                                                                                                             | S-FMDRS Total and SF-36 Physical Function scores: $r_s = -0.33-0.56$                                                                                                                                                   |
|                                                                                                                                                                                                                                                                                                                                                                                                                                                                                                                                                                                                              |                      | <ul style="list-style-type: none"> <li>• 0.66 LK presence / absence speech</li> <li>• 0.70 LK presence / absence gait</li> </ul>            | S-FMDRS Total scores and 10-metre walk time: $r_s = 0.25-0.53$                                                                                                                                                         |
| <b>CDS (Sarfraz &amp; Ijaz 2014)</b>                                                                                                                                                                                                                                                                                                                                                                                                                                                                                                                                                                         | FND = 57;<br>HC = 50 | Cronbach's $\alpha$ : <ul style="list-style-type: none"> <li>• 0.8 Total scores</li> <li>• 0.6-0.78 (disability, pain, seizures)</li> </ul> | Mean CDS scores: <ul style="list-style-type: none"> <li>• FND = 20.1</li> <li>• control group = 8.8</li> </ul> <p><math>p = 0.001</math></p> <p>89.5% FND patients correctly identified with clinical cut-off (14)</p> |
| <p><b>Key:</b> ACI = Gwet's ACI statistic; CDS-R=Conversion Disorder Scale-Revised; CGI = Clinical Global Impression scale; CSI-24 = Child Somatisation Inventory; FMD=functional movement disorder; FND=functional neurological disorder; GK = generalised Kappa; ICC = intraclass correlation coefficients; HC=healthy controls; KCC = Kendall's coefficient of concordance; LK = Light's Kappa; PMDRS=Psychogenic Movement Disorder Rating Scale; <math>r_s</math> = Spearman's rho correlation; S-FMDRS=Simplified Functional Movement Disorder Rating Scale; SF-36=Short Form Health Survey-36 item</p> |                      |                                                                                                                                             |                                                                                                                                                                                                                        |
