# Supplementary material for: Outcome measurement in functional neurological disorder: a systematic review and recommendations
Source: PubMed Central journal article supplement — J Neurol Neurosurg Psychiatry. 2020 Feb 28;91(6):638–49. doi: 10.1136/jnnp-2019-322180 (PMC7279198; doi:10.1136/jnnp-2019-322180), 2020-02-28
Supplement: jnnp-2019-322180supp005.pdf [file jnnp-2019-322180supp005.pdf]

## Supplementary File 3: RCTs in FND – study design details

| Study                              | Arms                                                                  | Design    | Symptoms / sample (n)  | Timepoints                             |
|------------------------------------|-----------------------------------------------------------------------|-----------|------------------------|----------------------------------------|
| <b>Demartini 2019a (Italy)</b>     | 1. Transcranial direct current stimulation (tDCS)<br>2. Sham tDCS     | Crossover | Motor (11R, 9C)        | Pre- / post-treatment                  |
| <b>Dreissen 2019 (Netherlands)</b> | 1. Botulinum toxin<br>2. Placebo                                      | Parallel  | Movement (49R, 48C)    | Baseline<br>4 m<br>End treatment (5 m) |
| <b>Taib 2019 (France)</b>          | 1. rTMS<br>2. Sham rTMS                                               | Parallel  | Movement (18R, 17C)    | 1, 2, 6, 12 m                          |
| <b>Tolchin 2019 (US)</b>           | 1. Motivational interviewing + psychotherapy<br>2. Psychotherapy only | Parallel  | Seizures (60R, 55C)    | Baseline<br>16 w                       |
| <b>Vizcarra 2019 (US)</b>          | 1. Botulinum toxin<br>2. Placebo                                      | Parallel  | Movement (14R, 10C)    | Baseline<br>12 w                       |
| <b>Ghanbarizadeh 2018 (Iran)</b>   | 1. Quetiapine (50mg)<br>2. Haloperidol (5mg)                          | Parallel  | Any (144R)             | 30 minutes<br>24 hours                 |
| <b>Jafari 2018 (Iran)</b>          | 1. Midazolam (2.5mg)<br>2. Haloperidol (2.5mg)                        | Parallel  | Any (140R, 140C)       | 24 hours<br>1 w                        |
| <b>Baird 2017 (US)</b>             | 1. CBT-ip<br>2. Sertraline<br>3. 1+2                                  | Parallel  | Seizures<br>(38R, 34C) | Baseline, start treatment<br>8, 16 wk  |
| <b>Garcin 2017 (France)</b>        | 1. TMS<br>2. RMS                                                      | Crossover | Movement (33R, 33C)    | Baseline<br>2, 3 d<br>3, 6, 12 m       |

## Supplementary File 3: RCTs in FND – study design details (continued)

| Study                               | Arms                                                                                              | Design    | Symptoms / sample (n)       | Timepoints                                    |
|-------------------------------------|---------------------------------------------------------------------------------------------------|-----------|-----------------------------|-----------------------------------------------|
| <b>Pleizier 2017 (Netherlands)</b>  | 1. Dx plus neurology<br>2. Dx plus GP                                                             | Parallel  | Any (200R, 195C)            | Baseline<br>3, 6, 12 m                        |
| <b>Dalocchio 2016 (Italy)</b>       | 1. CBT<br>2. CBT & APA                                                                            | Parallel  | Movement (29R, 21C)         | Baseline<br>12 wk (End treatment)             |
| <b>Drane 2016 (US)</b>              | 1. TAU<br>2. Scripted Dx plus psych consultation<br>3. Scripted Dx plus ongoing psychiatric input | Parallel  | Seizures (39R, 37C)         | Baseline<br>8 wk                              |
| <b>McWhirter 2016 (UK)</b>          | 1. TMS<br>2. TAU                                                                                  | Crossover | Paralysis (10R, 8C)         | Baseline<br>Post treatment, 3m                |
| <b>Nielsen 2017b (UK)</b>           | 1. Inpatient physiotherapy<br>2. TAU                                                              | Parallel  | Motor (60R, 57C)            | Baseline<br>4 wk, 6m                          |
| <b>Broersma 2015 (Netherlands)</b>  | 1. TMS<br>2. Sham TMS                                                                             | Crossover | Paralysis (12R, 8C)         | 1 d (Start treatment)<br>10 d (End treatment) |
| <b>Hubschmid 2015 (Switzerland)</b> | 1. Brief psychotherapy (MDT)<br>2. TAU                                                            | Parallel  | Seizures / Motor (23R, 21C) | Baseline<br>2, 6, 12 m                        |
| <b>Chen 2014 (US)</b>               | 1. Brief group psychoeducation<br>2. TAU                                                          | Parallel  | Seizures (64R, 41C)         | Baseline<br>3, 6 m                            |
| <b>Kompoliti 2014 (US)</b>          | 1. Psychodynamic psychotherapy<br>2. TAU (3 m)                                                    | Crossover | Movement (23R, 15C)         | Baseline<br>3, 6 m                            |
| <b>LaFrance 2014 (US)</b>           | 1. CBT-ip<br>2. Sertraline<br>3. 1+2<br>4. TAU                                                    | Parallel  | Seizures (38R, 34ITT)       | Baseline<br>2, 8 wk<br>End treatment (16 wk)  |
| <b>Jordbru 2013 (Norway)</b>        | 1. Inpatient physical activity+CBT<br>2. Wait list                                                | Crossover | Gait (60R, 40C)             | Baseline, start / end treatment               |

## Supplementary File 3: RCTs in FND – study design details (continued)

| Study                      | Arms                                                                              | Design    | Symptoms / sample (n)         | Timepoints                                     |
|----------------------------|-----------------------------------------------------------------------------------|-----------|-------------------------------|------------------------------------------------|
| <b>Thompson 2013 (US)</b>  | 1. Brief educational intervention<br>2. TAU                                       | Parallel  | Seizures (25R, 19C)           | Baseline<br>6-8 wk<br>1, 12 m                  |
| <b>Sharpe 2011 (UK)</b>    | 1. Guided Self-help & TAU<br>2. TAU                                               | Parallel  | Any (127R, 125C)              | Baseline<br>3, 6 m                             |
| <b>Goldstein 2010 (UK)</b> | 1. CBT & TAU<br>2. TAU                                                            | Parallel  | Seizures (66R, 59C, 64ITT)    | Baseline<br>End treatment (4m)<br>6 m          |
| <b>LaFrance 2010 (US)</b>  | 1. Sertraline<br>2. Placebo                                                       | Parallel  | Seizures (38 R, 26 C, 33 ITT) | Baseline, fortnightly<br>End treatment (12 wk) |
| <b>Oto 2010 (UK)</b>       | Withdrawal of AEDs<br>1. Immediate<br>2. Delayed (9 m)                            | Crossover | Seizures (25 R, 24 C, 25 ITT) | Baseline<br>9, 18 m                            |
| <b>Mousavi 2008 (Iran)</b> | 1. Muscle relaxation<br>2. Suggestion<br>3. Hypnosis<br>4. Diazepam (intravenous) | Parallel  | Any (except seizures) (80)    | Baseline<br>1 m                                |

## Supplementary File 3: RCTs in FND – study design details (continued)

| Study                           | Arms                                                | Design    | Symptoms / sample (n)             | Timepoints                                                    |
|---------------------------------|-----------------------------------------------------|-----------|-----------------------------------|---------------------------------------------------------------|
| <b>Khattak 2006 (Pakistan)</b>  | 1. Behavioural intervention & TAU<br>2. TAU         | Parallel  | Seizures (100R, 90C)              | Baseline<br>End treatment<br>1, 2, 3, 4 wk                    |
| <b>Ataoglu 2003 (Turkey)</b>    | 1. Paradoxical intention<br>2. Diazepam             | Parallel  | Seizures (30R, 30C)               | Baseline<br>End treatment (3 wk)<br>6 wk                      |
| <b>Moene 2002 (Netherlands)</b> | 1. Inpatient (MDT) & hypnosis<br>2. Inpatient (MDT) | Crossover | Motor Seizures (motor) (45R, 45C) | Baseline<br>1 m (mid treatment)<br>2 m (end treatment)<br>8 m |
| <b>Moene 2003 (Netherlands)</b> | 1. Hypnosis<br>2. Wait list                         | Crossover | Motor Seizures (motor) (49R, 44C) | Baseline<br>3 m (end treatment)<br>9 m (Hypnosis arm only)    |
| <b>Rampello 1996 (Italy)</b>    | 1. Haloperidol<br>2. Sulpiride                      | Parallel  | Any (18R)                         | Baseline<br>1, 2, 3, 4 m                                      |

## Supplementary File 3: RCTs in FND – study design details (continued)

| <b>PLANNED</b>                          | <b>Arms</b>                           | <b>Design</b> | <b>Symptoms (n)</b> | <b>Timepoints</b>               |
|-----------------------------------------|---------------------------------------|---------------|---------------------|---------------------------------|
| <b>/ IN PROGRESS / UNPUBLISHED</b>      |                                       |               |                     |                                 |
| <b>Bullock (US)</b>                     | 1. Embodied VR therapy<br>2. VR game  | Parallel      | Any (30)            | Baseline<br>1-6 w<br>6, 9, 12 m |
| <b>Goldstein 2015 (UK)</b>              | 1. CBT + TAU<br>2. TAU                | Parallel      | Seizures (298)      | Baseline<br>6, 12 m             |
| <b>Davis-Fobian (US)</b>                | 1. CBT<br>2. Supportive therapy       | Parallel      | Seizures (50)       | Baseline<br>4 m                 |
| <b>Hingray (France)</b>                 | 1. Telephone follow-up<br>2. TAU      | Parallel      | Seizures (13)       | 6, 12, 18, 24 m                 |
| <b>Koning-Tijssen (b) (Netherlands)</b> | 1. Internet-based self-help<br>2. TAU | Parallel      | Motor (200)         | Baseline<br>3, 6 m              |
| <b>Chastan (France)</b>                 | 1. rTMS<br>2. Sham rTMS               | Parallel      | Paralysis (94)      | Baseline<br>2, 60 d             |

|                          |                                           |          |                |           |
|--------------------------|-------------------------------------------|----------|----------------|-----------|
| <b>Nielsen 2019 (UK)</b> | 1. Specialist physiotherapy               | Parallel | Motor (264)    | Baseline  |
|                          | 2. TAU                                    |          |                | 6, 12 m   |
| <b>Nicholson (UK)</b>    | 1. TMS supra-motor threshold              | Parallel | Paralysis (60) | Baseline  |
|                          | 2. TMS sub-motor threshold                |          |                | 1, 2, 3 m |
| <b>Schommer (US)</b>     | 1. Group telephone therapy for depression | Waitlist | Seizures (20)  | Baseline  |
|                          | 2. Waitlist (3 m)                         |          |                | 6 m       |

**Arms:** AEDs=anti-epileptic drugs; APA=adjunctive physical activity; CBT=cognitive behavioural therapy; CBT-ip=CBT informed psychotherapy; Dx=diagnosis; GP=general practitioner; MDT=multidisciplinary team; RMS=root magnetic stimulation; r-TMS=repertive TMS; t-DCS=transcranial direct current stimulation; TAU=treatment as usual; TMS=transcranial magnetic stimulation; VR=virtual reality

**Blind:** A=assessor; D=deliverer; P=participant

**Sample:** C=complete cases; ITT=intention to treat analysis; R=randomised;

**Timepoints:** d=day; m=month; wk=week; yr=year
