# Supplementary material for: Outcome measurement in functional neurological disorder: a systematic review and recommendations
Source: PubMed Central journal article supplement — J Neurol Neurosurg Psychiatry. 2020 Feb 28;91(6):638–49. doi: 10.1136/jnnp-2019-322180 (PMC7279198; doi:10.1136/jnnp-2019-322180), 2020-02-28
Supplement: jnnp-2019-322180supp006.pdf [file jnnp-2019-322180supp006.pdf]

## Supplementary File 4: RCTs in FND – outcome measures

| Study                     | Primary outcome measure                        | Secondary / additional outcome measures |     |    |    |     |     |      |                                                                                                                                                                                                                  |
|---------------------------|------------------------------------------------|-----------------------------------------|-----|----|----|-----|-----|------|------------------------------------------------------------------------------------------------------------------------------------------------------------------------------------------------------------------|
|                           |                                                | SF 36 / 12                              | CGI |    |    | HCU | GAF | HADS | Other secondary measures                                                                                                                                                                                         |
|                           |                                                |                                         | S   | lc | lp |     |     |      |                                                                                                                                                                                                                  |
| <b>Demartini 2019a</b>    | Heartbeat detection task<br>Posner paradigm    |                                         |     |    |    |     |     |      |                                                                                                                                                                                                                  |
| <b>Dreissen 2019</b>      | CGI-lc                                         | ✓                                       | ✓   | ✓  | ✓  |     |     |      | Clinician-rated: PMDRS, MRC strength examination, MADRS<br>Self-report: symptom burden (visual analogue scale), ALDS, BAI, BDI, Liebowitz Social Anxiety Scale, Obsessive Compulsive Inventory<br>Adverse events |
| <b>Taib 2019</b>          | PMDRS                                          | ✓                                       | ✓   | ✓  | ✓  |     |     | ✓    | Clinician-rated: HAM-D<br>Self-report: TAS                                                                                                                                                                       |
| <b>Tolchin 2019</b>       | Treatment adherence                            |                                         |     |    |    | ✓   |     |      | Self-report: seizure frequency, QoLIE-10, emergency department visits                                                                                                                                            |
| <b>Vizcarra 2019</b>      | PMDRS                                          |                                         |     |    |    |     |     |      | Clinician-rated: HAM-D, HAM-A, Katz ADL index, Lawton Instrumental ADL scale                                                                                                                                     |
| <b>Ghanbarizadeh 2018</b> | Symptom resolution                             |                                         |     |    |    |     |     |      | Clinician-rated: Adverse effects: extrapyramidal symptoms, fatigue/sleepiness, headache, other                                                                                                                   |
| <b>Jafari 2018</b>        | Symptom resolution                             |                                         |     |    |    |     |     |      | Clinician-rated: Time to recovery, adverse effects                                                                                                                                                               |
| <b>Baird 2017</b>         | Seizure clusters (from seizure diaries)        |                                         | ✓   | ✓  |    | ✓   | ✓   |      | Clinician-rated: LIFERIFT, HAM-D, OHS<br>Self-report: BDI-II, BAI, DTS, DES, BIS, SCL-90, QoLIE-3I, QOL-BFS, ES, WoCQ, SEP<br>Objective: Unemployment, disability status, driving status                         |
| <b>Garcin 2017</b>        | Clinician-rated FMD scale (designed for study) |                                         |     |    | ✓  |     |     | ✓    | Clinician-rated: MINI (screen), CIDI                                                                                                                                                                             |

|                       |                                                           |   |   |   |   |                                                                                                                                                                                                    |
|-----------------------|-----------------------------------------------------------|---|---|---|---|----------------------------------------------------------------------------------------------------------------------------------------------------------------------------------------------------|
| <b>Pleizier 2017</b>  | SF-36                                                     | ✓ |   | ✓ | ✓ | Self-report: SCL-90 (somatisation), VAS (pain, general well-being), PCS, ALDS, symptom change                                                                                                      |
| <b>Dalocchio 2016</b> | PMDRS                                                     |   |   |   |   | Clinician-rated: HAM-D<br>Self-report: BAI, PHQ-15                                                                                                                                                 |
| <b>Drane 2016</b>     | Seizure frequency (previous month)                        |   |   | ✓ |   | Self-report: BDI-II, QOLIE-10-P, acceptance of Dx, beliefs about recovery                                                                                                                          |
| <b>McWhirter 2016</b> | Symptom severity (self-report)<br>Disability (SF-12, MRS) | ✓ |   |   |   | Clinician-rated: strength (dynamometry), tapping freq, MRS<br>Self-report: AUDIT                                                                                                                   |
| <b>Nielsen 2017b</b>  | NA (feasibility study)                                    | ✓ |   | ✓ | ✓ | Clinician-rated: timed walk, FMS, Berg<br>Self-report: EQ-5D-5L, WSAS, DASH, B-IPQ                                                                                                                 |
| <b>Broersma 2015</b>  | Strength (dynamometry)                                    |   |   |   |   | Clinician-rated: neurological exam (sensory, reflexes, coordination)<br>Self-report: Subjective strength (0-100%)                                                                                  |
| <b>Hubschmid 2015</b> | SDQ-20, CGI, MRS                                          | ✓ | ✓ | ✓ | ✓ | Clinician-rated: MINI, MADRS,<br>Self-report: DES, TAS, BDI, acceptance of MH referral                                                                                                             |
| <b>Chen 2014</b>      | Seizure frequency / intensity<br><br>WSAS                 |   |   | ✓ |   | Self-report: Seizure-related HCU; onset of new MUS; beliefs about seizures (e.g., triggers, understanding, fear, control); SIMS, HHC, HAS, BDI-II                                                  |
| <b>Kompoliti 2014</b> | PMDRS                                                     |   | ✓ | ✓ |   | Clinician-rated: HAM-D, MMPI-2<br>Self-report: BAI                                                                                                                                                 |
| <b>LaFrance 2014</b>  | Seizure frequency (daily calendars, family assist)        |   | ✓ | ✓ | ✓ | Clinician-rated: LIFERIFT, HAM-D, OHS<br>Self-report: BDI-II, BAI, DTS, DES, BIS, SCL-90 (somatic), QoLIE-31, QOL-BFS, ES, WoCQ, SEP<br>Objective: Unemployment, disability status, driving status |
| <b>Jordbru 2013</b>   |                                                           | ✓ |   |   |   | Clinician-rated: FIM, FMS<br>Self-report: Employment status                                                                                                                                        |

|                       |                                                                     |   |   |   |   |                                                                                                                                |
|-----------------------|---------------------------------------------------------------------|---|---|---|---|--------------------------------------------------------------------------------------------------------------------------------|
| <b>Thompson 2013</b>  | Contact with MH professional (measure designed for study)           |   |   | ✓ |   | Self-report: QoLIE-31, seizure frequency / intensity                                                                           |
| <b>Sharpe 2011</b>    | CGI-IP                                                              | ✓ |   | ✓ | ✓ | Clinician-rated: PRIME-MD<br>Self-report: CPS, PHQ-15, WI, IPQ, treatment satisfaction                                         |
| <b>Goldstein 2010</b> | Seizure frequency (monthly, from diaries)                           |   |   | ✓ | ✓ | Self-report: Seizure freedom for 3 m at 6 m follow-up, WSAS, CSRI (HCU, employment)                                            |
| <b>LaFrance 2010</b>  | Seizure frequency (biweekly, from daily diaries), patient & witness | ✓ | ✓ |   | ✓ | Clinician-rated: SCID, HAM-D, OHS, LIFERIFT<br>Self-report: BDI-II, DES, SCL-90 (Somatic), WoCQ, QoLIE-31, BIS, DTS, WoCQ, FAD |
| <b>Oto 2010</b>       | Seizure frequency (monthly)                                         |   |   | ✓ | ✓ | Self-report: SEALS, IPQ, employment<br>Speed of recovery / relapse                                                             |
| <b>Mousavi 2008</b>   | Recovery / remission                                                |   |   |   |   |                                                                                                                                |
| <b>Khattak 2006</b>   | Seizure frequency (diaries)                                         |   | ✓ |   | ✓ |                                                                                                                                |
| <b>Ataoglu 2003</b>   | Seizure frequency (previous week)                                   |   |   |   |   | Clinician-rated: HAM-A                                                                                                         |
| <b>Moene 2002</b>     | Video rating scale                                                  |   |   |   |   | Clinician-rated: ICIDH, SHCS<br>Self-report: SCL-90, Patient expectations                                                      |
| <b>Moene 2003</b>     | Video rating scale                                                  |   |   |   |   | Clinician-rated: ICIDH, SHCS<br>Self-report: SCL-90, Patient expectations                                                      |
| <b>Rampello 1996</b>  | Symptom severity                                                    |   |   |   |   | Clinician-rated: HAM-A, HAM-D<br>Self-report: Middlesex Hospital Questionnaire – hysteria subscale                             |

| PLANNED / IN PROGRESS / UNPUBLISHED TRIALS | Primary outcome measure           | Secondary / additional outcome measures |     |     |     |      |                                                                                                                                                                                                           |
|--------------------------------------------|-----------------------------------|-----------------------------------------|-----|-----|-----|------|-----------------------------------------------------------------------------------------------------------------------------------------------------------------------------------------------------------|
|                                            |                                   | SF 36 / 12                              | CGI | HCU | GAF | HADS | Other secondary measures                                                                                                                                                                                  |
|                                            |                                   | S                                       | Ic  | Ip  |     |      |                                                                                                                                                                                                           |
| <b>Bullock (US)</b>                        | Treatment adherence               |                                         |     |     | ✓   |      | Self-report: General Self-Efficacy Scale; GAD-7; PHQ-9; adverse events (frequency); Symptoms (freq/severity)<br>Clinician-rated: OHS                                                                      |
| <b>Goldstein 2015 (UK)</b>                 | Seizure frequency (4 w) (diaries) | ✓                                       |     | ✓   | ✓   |      | Self-report: seizure severity (SSS), freedom, reduction, treatment satisfaction, WSAS, GAD-7, PHQ-9, extended PHQ-15, CORE-10, ED-5Q-5L, CSRI, CGI-I                                                      |
| <b>Davis-Fobian (US)</b>                   | Seizure frequency (diaries)       |                                         |     |     |     |      | Adolescent Coping Orientation for Problem Experiences<br>Self-report: seizure frequency, seizure severity, Beck-21; DES; SDQ-20; TAS-20; brief COPE; planned HCU; emergency HCU<br>Clinician-rated: HAM-A |
| <b>Hingray (France)</b>                    | SF-36; QoLIE-3I                   | ✓                                       |     |     | ✓   |      | Self-report: IPQ, WSAS, EQ-5D, PHQ, CIS-fatigue, satisfaction, adverse events<br>QALY                                                                                                                     |
| <b>Koning-Tijssen (b) (Netherlands)</b>    | CGI-Ip                            | ✓                                       |     | ✓   | ✓   |      | Side effects, symptom severity (interview, examination)                                                                                                                                                   |
| <b>Chastan (France)</b>                    | Symptom severity (video)          |                                         |     |     |     |      | Self-report: IPQ-Revised, Work Productivity & Impairment Questionnaire, EQ-5D-5L, CSRI, FMS                                                                                                               |
| <b>Nielsen (UK)</b>                        | SF-36 Physical function           | ✓                                       |     |     | ✓   | ✓    | Self-report: WSAS, SF-36, CSRI, PHQ-9; PHQ-15, GAD-7, CORE-10, strength ratings<br>Clinician-rated: FIM/FAM, Barthel, Dynamometry                                                                         |
| <b>Nicholson (UK)</b>                      | CGI-Ip / Ic                       | ✓                                       | ✓   | ✓   | ✓   |      | Self-report: Seizure frequency, PHQ-9, GAD-7, SCL-90                                                                                                                                                      |
| <b>Schommer (US)</b>                       | Treatment adherence               |                                         |     |     |     |      |                                                                                                                                                                                                           |

**Key**

**Clinician-rated:** ADL=activities of daily living; Berg=Berg Balance Scale; CGI-Ic=Clinical Global Impressions-Improvement (clinician); CGI-S=Clinical Global Impressions-Severity; FAM=Functional Assessment Measure; FIM=Functional Independence Measure; GAF=Global Assessment of Functioning; HAM-D=Hamilton Depression Rating Scale; HAM-A=Hamilton Rating Scale for Anxiety; ICIDH=International Classification of Impairments, Disabilities and Handicaps; LIFERIFT=Longitudinal Interval Follow-up Evaluation-Range of Impaired Functioning Tool (quality of relationships tool); MADRS=Montgomery Asberg Depression Scale; MINI=Mini International Neuropsychiatric interview; MRS=Modified Rankin Scale; OHS=Oxford Handicap Scale; PMDRS=Psychogenic Movement Disorder Rating Scale; PRIME-MD=Primary Care Evaluation of Mental Disorders; SCID=Structured Clinical Interview for Diagnosis; SHCS=Stanford Hypnotic Clinical Scale; VRMC=Video Rating Scale for Motor Conversion Symptoms

**Self-report:** ALDS=AMC Linear Disability Scale; AUDIT=Alcohol Use Identification Test; BAI=Beck Anxiety Inventory; BDI-II=Beck Depression Inventory (2<sup>nd</sup> ed); BAES=Beliefs About Emotions Scale; B-IPQ=Brief Illness Perception Questionnaire; BIS=Barratt Impulsiveness Scale; CGI-Ip=Clinical Global Impressions-Improvement (patient); CIDI=Composite International Diagnostic Interview; CIS=Checklist individual Strength; CORE=Clinical Outcomes in Routine Evaluation; CPS=Change in Presenting Symptoms Scale; CS=Credibility/Expectancy Questionnaire; CSRI=Client Service Receipt Inventory; DASH=Disabilities of Arm, Shoulder and Hand; DES=Dissociative Experiences Scale; DTS=Davidson Trauma Scale; ES=Expectations Scale; Family Assessment Device=FAD; FMS=Functional Mobility Scale; GAD-7=Generalised Anxiety Disorder scale - 7 item; HADS=Hospital Anxiety & Depression Scale; HAS=Health Attitudes Survey; HCU=Health Care Utilization; HHC=Health History Checklist; IPQ=Illness Perception Questionnaire; QoLIE=Quality of Life in Epilepsy; QOL-BFS=QOL Burden to Family Scale; MMPI-2=Minnesota Multiphasic Personality Inventory - second edition; Neuro-QoL=Quality of Life in Neurological Disorders; PCS=Pain Catastrophising Scale; PANAS=Positive and Negative Affect Schedule; PHQ=Patient Health Questionnaire; SCL-90=Symptom Checklist-90; SDQ-20=Somatoform Dissociation Questionnaire - 20 item version; SEALS=Side Effects and Life Satisfaction inventory; SEP=Side Effects Profile; SIMS=Structured Inventory of Malingering Symptomatology; SOMS-7=Screening for Somatoform Symptoms - 7; SSS=Seizure Severity Scale; TAS=Toronto Alexithymia Scale; VAS=Visual Analogue Scale; WI=Whiteley Index; WoCQ=Ways of Coping Questionnaire; WSAS=Work and Social Adjustment Scale
