# Supplementary material for: Outcome measurement in functional neurological disorder: a systematic review and recommendations
Source: PubMed Central journal article supplement — J Neurol Neurosurg Psychiatry. 2020 Feb 28;91(6):638–49. doi: 10.1136/jnnp-2019-322180 (PMC7279198; doi:10.1136/jnnp-2019-322180), 2020-02-28
Supplement: jnnp-2019-322180supp007.pdf [file jnnp-2019-322180supp007.pdf]

**Supplementary File 5: Observational treatment studies**

| <b>Study</b>                        | <b>Sample</b>            | <b>Intervention</b>                                                                    | <b>Outcome measures</b>                                                                                                                                    | <b>Timepoints</b>               |
|-------------------------------------|--------------------------|----------------------------------------------------------------------------------------|------------------------------------------------------------------------------------------------------------------------------------------------------------|---------------------------------|
| Aybek 2013<br>(Switzerland)         | Mixed symptoms (n=23)    | Integrated care<br>(neurology/psychiatry)<br>OR<br>TAU                                 | Self-report: SF-36, overall outcome, symptom severity, understanding of FND, employment, HCU                                                               | 3 y                             |
| Barry 2008<br>(US)                  | Seizures (n=7)           | Group psychotherapy                                                                    | Self-report: seizure log, BDI, SCL-90                                                                                                                      | Baseline<br>16 w<br>32 w        |
| Bullock 2015<br>(US)                | Seizures (n=17)          | Group dialectical behaviour<br>therapy skills training (+<br>individual psychotherapy) | Self-report: DBT skills use diaries, seizure log                                                                                                           | Start/end treatment             |
| Conwill 2014<br>(UK)                | Mixed symptoms (n=16)    | CBT-based group<br>psychotherapy                                                       | Clinician-rated: CGI-S, CGI-I<br>Self-report: SF-36, HADS                                                                                                  | Start/end treatment             |
| Cope 2017<br>(UK)                   | Seizures (n=19)          | CBT-based group<br>psychoeducation                                                     | Self-report: seizure frequency / intensity, attitudes<br>towards symptoms, ET-7, PHQ-9, GAD-7, WSAS,<br>B-IPQ, patient satisfaction/perceptions of therapy | Pre- / post-<br>treatment       |
| Dalocchio 2010 (Italy)              | Movement (n=16)          | Physical activity (walking<br>program)                                                 | Clinician-rated: PMDRS; HAM-D; VO2 Max; BMI<br>Self-report: BAI                                                                                            | Pre- / post-<br>treatment       |
| De Barros 2018<br>(Brazil)          | Seizures+epilepsy (n=47) | CBT-based group<br>psychotherapy                                                       | Clinician-rated: HAM-D, HAM-A<br>Self-report: SF-36, TAS, WoCQ                                                                                             | Pre- / post-<br>treatment       |
| Demartini 2014<br>(UK)              | Mixed symptoms (n=66)    | Specialist inpatient<br>multidisciplinary<br>rehabilitation                            | Clinician-rated: HoNoS, COPM<br>Self-report: HADS, Fear Questionnaire, PHQ-15,<br>IPQ-R, CGI-I (end treatment, 1 y), CNSQ                                  | Start/end treatment<br>1 y      |
| Demartini 2019b (Italy)             | Motor (n=18)             | Physical therapy<br>telemedicine                                                       | Clinician-rated: PMDRS; HAM-D; HAM-A<br>Self-report: TAS; SF-36; CGI-I                                                                                     | Start treatment<br>12 w<br>24 w |
| De Oliveira Santos 2014<br>(Brazil) | Seizures (n=37)          | Psychoanalytic<br>psychotherapy                                                        | Self-report: seizure frequency, cessation                                                                                                                  | Pre- / post-<br>treatment       |
| Duncan 2016<br>(UK)                 | Seizures (n=89)          | Psychological therapy<br>(clinical psychologist)                                       | Self-report: seizure freedom (>2 m), HCU<br>(primary/secondary care)                                                                                       | 6 m<br>3 y                      |

|                               |                                                |                                                                                            |                                                                                                                       |                                               |
|-------------------------------|------------------------------------------------|--------------------------------------------------------------------------------------------|-----------------------------------------------------------------------------------------------------------------------|-----------------------------------------------|
| Espay 2014 (US)               | Movement (n=10)                                | Tremor retraining                                                                          | Clinician-rated: PMDRS                                                                                                | Pre- / post-treatment                         |
| Ferrara 2011 (US)             | Movement (n=19)                                | Transcutaneous electrical nerve stimulation                                                | Clinician-rated: PMDRS<br>Self-report: symptom magnitude, persistence, disability (0-10 scale); adverse events        | Baseline<br>4 m                               |
| Garcin 2013 (France)          | Movement (n=24)                                | rTMS (motor cortex)                                                                        | Clinician-rated: video rating scale<br>Self-report: CGI-I                                                             | Pre- / post-treatment                         |
| Goldstein 2004 (UK)           | Seizures (n=16)                                | CBT                                                                                        | Self-report: seizure frequency; WSAS; HADS; Fear Questionnaire; employment status; IPQ; MHLC; seizure-related beliefs | Pre-treatment<br>End treatment<br>6 m         |
| Hallett NCT03263013 (US)      | Movement (n=8)                                 | TMS/Intermittent theta-burst stimulation of dorsolateral prefrontal cortex                 | Feasibility/acceptability parameters                                                                                  | Baseline<br>End treatment                     |
| Hinson 2006 (US)              | Movement (n=9)                                 | Psychodynamic psychotherapy                                                                | Clinician-rated: PMDRS, HAM-D, GAF, DSM-IV structured clinical interview<br>Self-report: BAI                          | Baseline<br>End treatment                     |
| Hovorka 2007 (Czech Republic) | Seizures (n=56)                                | Video-EEG confirmed diagnoses + AED withdrawal + psychiatry/psychology +/- pharmacotherapy | Self-report: seizure frequency                                                                                        | 2 y                                           |
| Insch NCT03857347 (UK)        | Mixed symptoms (n=25)                          | Brief group psychoeducation                                                                | Self-report: SF-36                                                                                                    | Baseline<br>2 w (pre-treatment)<br>4 w<br>3 m |
| Kienle 2018 (Germany)         | Mixed symptoms (n=19); healthy controls (n=19) | Inpatient multidisciplinary treatment                                                      | Self-report: SDQ-20; symptom severity (0-10 Likert); SCL-90-R; TAS; ERQ<br>Laboratory: EEG during emotion regulation  | Start/end treatment                           |
| Kozłowska 2018 (Australia)    | Seizures (n=60, paediatric)                    | Specialist inpatient programme (2 weeks)                                                   | Clinician-rated: GAF, educational functioning                                                                         | Start/end treatment                           |

|                              |                        |                                                       |                                                                                                                                                                                 |                                                    |
|------------------------------|------------------------|-------------------------------------------------------|---------------------------------------------------------------------------------------------------------------------------------------------------------------------------------|----------------------------------------------------|
| Kuyk 2008<br>(Netherlands)   | Seizures (n=22)        | Specialist inpatient multidisciplinary rehabilitation | Clinician-rated: seizure frequency (start/end treatment)<br>Self-report: seizure frequency, duration, control (6 m), SCL-90, BDI, STAI, UCL, SF-36, coping skills measure, DISQ | Start/end treatment<br>6 m                         |
| LaFrance 2009 (US)           | Seizures (n=17)        | CBT                                                   | Clinician-rated: OHS, GAF; LIFERIFT<br>Self-report: seizure frequency; BDI-II; DTS; DES; BIS; FAD; SCL-90; WoCQ; QoLIE-3 I                                                      | Pre-treatment<br>Fortnightly<br>4 m<br>8 m<br>12 m |
| Maa NCT01919307 (US)         | Seizures (n=29)        | Auricular acupuncture                                 | Treatment completion; seizure diary completion; seizure frequency; adverse events                                                                                               | Baseline<br>End treatment (12w)<br>16 w            |
| Mayor 2010 (UK)              | Seizures (n=47)        | Brief augmented psychodynamic interpersonal therapy   | Self-report: seizure frequency, HCU                                                                                                                                             | 12-61 m                                            |
| Mayor 2013 (UK)              | Seizures (n=13)        | Brief manualised psychoeducation                      | Self-report: seizure frequency, SF-36, symptom attribution, FAI, HCU, medication, employment / educational status                                                               | Start/end treatment<br>3 m                         |
| Metin 2013                   | Seizures (n=13)        | Group psychotherapy                                   | Self-report: seizure log, BDI, DES, STAI, SF-36 Life Quality, TAS                                                                                                               | Start / end therapy                                |
| Modirrousta NCT02796924 (US) | Seizures (n=15)        | r-TMS of temporal-parietal junction                   | Self-report: seizure frequency                                                                                                                                                  | Pre/post treatment                                 |
| Myers 2017 (US)              | Seizures & PTSD (n=16) | Prolonged exposure therapy                            | Self-report: seizure frequency, BDI-II, PDS                                                                                                                                     | Start/end therapy                                  |
| Nielsen 2015 (UK)            | Motor (n=47)           | Specialist 5-day physiotherapy                        | Clinician-rated: Berg Balance Scale, 10-metre Walk Test<br>Self-report: SF-36, EQ-5D-5L, HADS, WSAS, CGI-I                                                                      | Start/end treatment<br>3 m                         |
| Perez NCT03731078 (US)       | Motor (n=70)           | CBT-informed physiotherapy                            | Clinician-rated: CGI-I; S-FMDRS; 10-metre walk; Five Times Sit-to-Stand test<br>Self-report: SF-36; CGI-I; SOMS-CD; PHQ-15                                                      | Pre/post treatment                                 |

|                      |                                      |                                                     |                                                                                                |                                       |
|----------------------|--------------------------------------|-----------------------------------------------------|------------------------------------------------------------------------------------------------|---------------------------------------|
| Pintor 2010 (Spain)  | Seizures + anxiety/depression (n=19) | Venlafaxine                                         | Clinician-rated: HAM-A; HAM-D<br>Self-report: seizure frequency; HADS                          | Baseline<br>1, 2, 3, 4, 5 m           |
| Reuber 2007          | Mixed symptoms (n=64)                | Brief psychodynamic interpersonal therapy           | Self-report: CORE-OM, SF-36, PHQ-15                                                            | Start/end treatment<br>6 m            |
| Tolchin 2018         | Seizures (n=123)                     | Outpatient psychiatry                               | Clinician-rated: treatment adherence                                                           | 1, 2.5, 4, 10 m                       |
| Vandenberg 2015 (US) | Movement (n=27)                      | Outpatient rehabilitation program                   | Clinician-rated: modified Gait Abnormality Rating Scale; walking speed                         | Start/end treatment                   |
| Voon & Lang 2005     | Movement (n=23)                      | Antidepressant medication                           | Clinician-rated: MADRS, CGI-S, CGI-I<br>Self-report: BAI, occupational/educational functioning | Baseline (start treatment)<br>3, 16 m |
| Williams 2018 (UK)   | Mixed symptoms (n=44)                | Brief augmented psychodynamic interpersonal therapy | Self-report: EPS-25, SF-36; PHQ-15, CORE-10, B-IPQ                                             | Start/end treatment                   |
| Wiseman 2016 (UK)    | Seizures (n=25)                      | Brief manualised psychoeducation                    | Self-report: seizure frequency, CORE-OM, IPQ, WSAS, NEWQoL-6D, ED-QoL, symptom attribution     | Start/end treatment                   |
| Yu NCT03660098 (US)  | Movement (n=14)                      | Mirror box therapy                                  | Clinician-rated: S-FMDRS<br>Self-report: symptom severity (0-4)                                | Pre/post mirror box procedure         |
| Zaroff 2004 (US)     | Seizures (n=7)                       | Group psychoeducation                               | Self-report: seizure frequency, CISS, STAXI-2, QOLIE-31                                        | Pre- / post-treatment                 |

**Key:** BAI = Beck Anxiety Inventory; BDI = Beck Depression Inventory; BIPQ = Brief Illness Perception Questionnaire; BIS = Barratt Impulsiveness Scale; CBT = cognitive behavioural therapy; CGI = Clinical Global Impression; CISS = Coping Inventory for Stressful Situations; CNSQ = Common Neurological Symptom Questionnaire; COPM = Canadian Occupational Performance Measure; CORE-OM = Clinical Outcomes in Routine Evaluation - Outcome Measure; DBT = dialectical behaviour therapy; DES = Dissociative Experiences Scale; DISQ = Dissociation Questionnaire; DTS = Davidson Trauma Scale; ED-QoL = EQ-5D; EEG=electroencephalography; EPS-25 = Emotional Processing Scale – 25; ERQ=Emotion Regulation Questionnaire; ET-7 = Revised Emotional Thermometer Scale; FAD = Family Assessment Device; FAI = Frenchay Activity Index; GAD-7 = Generalised Anxiety Disorder scale – 7; GAF = Global Assessment of Functioning; HADS = Hospital Anxiety & Depression Scale; HAM-A = Hamilton Rating Scale – Anxiety; HAM-D = Hamilton Rating Scale- Depression; HCU = healthcare utilisation; HoNoS = Health of the Nation Outcome Scale; IPQ = Illness Perception Questionnaire; LIFERIFT = Longitudinal Interval Follow-up Evaluation–Range of Impaired Functioning Tool; MADRS = Montgomery Asberg Depression Scale; MHLC = Multidimensional Health Locus of Control; NEWQoL-6D = epilepsy specific QoL measure; OHS = Oxford Handicapped Scale; PDS = Post-Traumatic Stress Diagnostic Scale; PHQ = Patient Health Questionnaire; PMDRS=Psychogenic Movement Disorder Rating Scale; QoLIE-31 = Quality of Life in Epilepsy Inventory-31; S-FMDRS=Simplified Functional Movement Disorder Rating Scale; SCL-90 = Symptom Checklist – 90; SDQ-20=Somatoform Dissociation Questionnaire – 20 item; SF-36 = Short Form Health Survey – 36; SOMS-CD=Screening for Somatic Symptoms Conversion Disorder subscale; STAI = State Trait Anxiety Inventory; STAXI-2 = State Trait Anger Expression Inventory – 2; TAS = Toronto Alexithymia Scale; TMS = transcranial magnetic stimulation; UCL = Utrecht Coping List; WoCQ = Ways of Coping Questionnaire; WSAS = Work & Social Adjustment Scale
