# Supplementary material for: Outcome measurement in functional neurological disorder: a systematic review and recommendations
Source: PubMed Central journal article supplement — J Neurol Neurosurg Psychiatry. 2020 Feb 28;91(6):638–49. doi: 10.1136/jnnp-2019-322180 (PMC7279198; doi:10.1136/jnnp-2019-322180), 2020-02-28
Supplement: jnnp-2019-322180supp009.pdf [file jnnp-2019-322180supp009.pdf]

## Supplementary file 7 – Additional references

- [S1] Baird GL, Harlow LL, Machan JT, et al. Cluster reduction in patients in a pilot treatment trial for psychogenic nonepileptic seizures. *Epilepsy Behav* 2017;**73**:273-279.
- [S2] LaFrance WC, Jr., Baird GL, Barry JJ, et al. Multicenter Pilot Treatment Trial for Psychogenic Nonepileptic Seizures A Randomized Clinical Trial. *JAMA Psychiatry* 2014;**71**(9):997-1005.
- [S3] Thompson N, Connelly L, Peltzer J, et al. Psychogenic nonepileptic seizures: a pilot study of a brief educational intervention. *Perspect Psychiatr Care* 2013;**49**(2):78-83.
- [S4] Tolchin B., Baslet G., Suzuki J., et al. Randomized controlled trial of motivational interviewing for psychogenic nonepileptic seizures. *Epilepsia* 2019;**60**(5):986-995.
- [S5] Dallochio C, Tinazzi M, Bombieri F, et al. Cognitive Behavioural Therapy and Adjunctive Physical Activity for Functional Movement Disorders (Conversion Disorder): a Pilot, Single-Blinded, Randomized Study. *Psychother Psychosom* 2016;**85**(6):381-383.
- [S6] Kompoliti K, Wilson B, Stebbins G, et al. Immediate vs. delayed treatment of psychogenic movement disorders with short term psychodynamic psychotherapy: randomized clinical trial. *Parkinsonism Relat Disord* 2014;**20**(1):60-63.
- [S7] Taib S, Ory-Magne F, Brefel-Courbon C, et al. Repetitive transcranial magnetic stimulation for functional tremor: A randomized, double-blind, controlled study. *Mov Disord* 2019;**34**:1210-1219.
- [S8] Vizcarra J.A., LopezCastellanos J.R., Dwivedi A.K., et al. OnabotulinumtoxinA and cognitive behavioral therapy in functional dystonia: A pilot randomized clinical trial. *Parkinsonism Relat Disord* 2019;**63**:174-178.
- [S9] Garcin B, Mesrati F, Hubsch C, et al. Impact of transcranial magnetic stimulation on functional movement disorders: cortical modulation or a behavioral effect? *Front Neurol* 2017;**8**:338.
- [S10] Dreissen YEM, Dijk JM, Gelauff JM, et al. Botulinum neurotoxin treatment in jerky and tremulous functional movement disorders: a double-blind, randomised placebo-controlled trial with an open-label extension. *J Neurol Neurosurg Psychiatry* 2019 Epub ahead of print 20<sup>th</sup> June 2019. doi: 10.1136/jnnp-2018-320071
- [S11] Jordbru AA, Smedstad LM, KlungsÅ, yr O, et al. Psychogenic gait disorder: a randomized controlled trial of physical rehabilitation with one-year follow-up. *J Rehabil Med* 2014;**46**(2):181-187.
- [S12] McWhirter L, Ludwig L, Carson A, et al. Transcranial magnetic stimulation as a treatment for functional (psychogenic) upper limb weakness. *J Psychosom Res* 2016;**89**:102-106.
- [S13] Broersma M, Koops EA, Vroomen PC, et al. Can repetitive transcranial magnetic stimulation increase muscle strength in functional neurological paresis? A proof-of-principle study. *Eur J Neurol* 2015;**22**(5):866-873.
- [S14] Nielsen G, Stone J, Buszewicz M, et al. Physio4FMD: protocol for a multicentre randomised controlled trial of specialist physiotherapy for functional motor disorder. *BMC Neurol* 2019;**19**, 242. doi:10.1186/s12883-019-1461-9
- [S15] Nielsen G, Buszewicz M, Stevenson F, et al. Randomised feasibility study of physiotherapy for patients with functional motor symptoms. *J Neurol Neurosurg Psychiatr* 2017;**88**(6):484-490.
- [S16] Moene FC, Spinhoven P, Hoogduin KA, et al. A randomised controlled clinical trial on the additional effect of hypnosis in a comprehensive treatment programme for in-patients with conversion disorder of the motor type. *Psychother Psychosom* 2002;**71**(2):66-76.

- [S17] Moene FC, Spinhoven P, Hoogduin KA, et al. A randomized controlled clinical trial of a hypnosis-based treatment for patients with conversion disorder, motor type. *Int J Clin Exp Hypn* 2003;**51**(1):29-50.
- [S18] Rampello L, Raffaele R, Nicoletti G, et al. Hysterical neurosis of the conversion type: therapeutic activity of neuroleptics with different hyperprolactinemic potency. *Neuropsychobiol* 1996;**33**(4):186-188.
- [S19] Hubschmid M, Aybek S, Maccaferri GE, et al. Efficacy of brief interdisciplinary psychotherapeutic intervention for motor conversion disorder and nonepileptic attacks. *Gen Hosp Psychiatry* 2015;**37**(5):448-455.
- [S20] Sharpe M, Walker J, Williams C, et al. Guided self-help for functional (psychogenic) symptoms: a randomized controlled efficacy trial. *Neurology* 2011;**77**(6):564-572.
- [S21] Mousavi SG, Rahimi J, Afshar H. Comparison of four different treatment options in the management of acute conversion disorder. *Iranian J Psychiatry Behav Sci* 2008;**2**(1):21-25.
- [S22] Pleizier M, de Haan RJ, Vermeulen M. Management of patients with functional neurological symptoms: a single-centre randomised controlled trial. *J Neurol Neurosurg Psychiatry* 2017;**88**(5):430-436.
- [S23] Demartini B, Volpe R, Mattavelli G, et al. The neuromodulatory effect of tDCS in patients affected by functional motor symptoms: an exploratory study. *Neurol Sci* 2019;**40**(9):1821-1827.
- [S24] Beecham J, Knapp M. Costing psychiatric interventions. *Measuring Mental Health Needs*. Gaskell, London, UK 2001; 200-224.
- [S25] Herdman M, Gudex C, Lloyd A, et al. Development and preliminary testing of the new five-level version of EQ-5D (EQ-5D-5L). *Qual Life Res* 2011;**20**(10):1727-1736.
- [S26] Broadbent E, Petrie KJ, Main J, et al. The brief illness perception questionnaire. *J Psychosom Res* 2006;**60**(6):631-637.
- [S27] Weinman J, Petrie KJ, Moss-Morris R, et al. The illness perception questionnaire: a new method for assessing the cognitive representation of illness. *Psychol Health* 1996;**11**(3):431-445.
- [S28] Moss-Morris R, Weinman J, Petrie K, et al. The revised illness perception questionnaire (IPQ-R). *Psychol Health* 2002;**17**(1):1-16.
- [S29] Carson AJ, Stone J, Hansen CH, et al. Somatic symptom count scores do not identify patients with symptoms unexplained by disease: a prospective cohort study of neurology outpatients. *J Neurol Neurosurg Psychiatry* 2015;**86**(3):295-301.
- [S30] Demartini B., Petrochilos P., Edwards M.J., et al. Multidisciplinary treatment for functional neurological symptoms: A prospective study. *J Neurol* 2014;**261**: 2370-2377.
- [S31] Conwill M, Oakley L, Evans K, et al. CBT-based group therapy intervention for nonepileptic attacks and other functional neurological symptoms: a pilot study. *Epilepsy Behav* 2014;**34**:68-72.
- [S32] Demartini B, Bombieri F, Goeta D, et al. A physical therapy programme for functional motor symptoms: A telemedicine pilot study. *Parkinsonism Relat Disord* 2019 Epub ahead of print 3<sup>rd</sup> May 2019. doi: 10.1016/j.parkreldis.2019.05.004
- [S33] Garcin B, Roze E, Mesrati F, et al. Transcranial magnetic stimulation as an efficient treatment for psychogenic movement disorders. *J Neurol Neurosurg Psychiatry* 2013;**84**(9):1043-1046.
- [S34] Nielsen G, Ricciardi L, Demartini B, et al. Outcomes of a 5-day physiotherapy programme for functional (psychogenic) motor disorders. *J Neurol* 2015;**262**(3):674-681.

- [S35] Voon V, Lang A. Antidepressant treatment outcomes of psychogenic movement disorder. *J Clin Psychiatry* 2005;**66**(12):1529-1534.
- [S36] de Barros ACS, Furlan AER, Marques LHN, et al. Effects of a psychotherapeutic group intervention in patients with refractory mesial temporal lobe epilepsy and comorbid psychogenic nonepileptic seizures: A nonrandomized controlled study. *Seizure* 2018;**58**:22-28.
- [S37] Kuyk J, Siffels MC, Bakvis P, et al. Psychological treatment of patients with psychogenic non-epileptic seizures: an outcome study. *Seizure* 2008;**17**(7):595-603.
- [S38] Bullock KD, Mirza N, Forte C, et al. Group Dialectical-Behavior Therapy Skills Training for Conversion Disorder With Seizures. *J Neuropsychiatry Clin Neurosci* 2015;**27**(3):240-243.
- [S39] Goldstein LH, Deale AC, Mitchell-O'Malley SJ, et al. An Evaluation of Cognitive Behavioral Therapy As A Treatment for Dissociative Seizures: A Pilot Study. *Cogn Behav Neurol* 2004;**17**(1):41-49.
- [S40] LaFrance WCJ, Friedman JH. Cognitive behavioral therapy for psychogenic movement disorder. *Mov Disord* 2009;**24**(12):1856-1857.
- [S41] Mayor R, Howlett S, Grunewald R, et al. Long-term outcome of brief augmented psychodynamic interpersonal therapy for psychogenic nonepileptic seizures: Seizure control and health care utilization. *Epilepsia* 2010;**51**(7):1169-1176.
- [S42] Metin SZ, Ozmen M, Metin B, et al. Treatment with group psychotherapy for chronic psychogenic nonepileptic seizures. *Epilepsy Behav* 2013;**28**(1):91-94.
- [S43] Myers L, Vaidya-Mathur U, Lancman M. Prolonged exposure therapy for the treatment of patients diagnosed with psychogenic non-epileptic seizures (PNES) and post-traumatic stress disorder (PTSD). *Epilepsy Behav* 2017;**66**:86-92.
- [S44] Pintor L, Bailles E, Matrai S, et al. Efficiency of venlafaxine in patients with psychogenic nonepileptic seizures and anxiety and/or depressive disorders. *J Neuropsychiatry Clin Neurosci* 2010;**22**(4):401-408.
- [S45] Cope SR, Smith JG, King T, et al. Evaluation of a pilot innovative cognitive-behavioral therapy-based psychoeducation group treatment for functional non-epileptic attacks. *Epilepsy Behav* 2017;**70**(Pt A):238-244.
- [S46] Dalocchio C, Arbasino C, Klersy C, et al. The effects of physical activity on psychogenic movement disorders. *Mov Disord* 2010;**25**(4):421-425.
- [S47] Ferrara J, Stamey W, Strutt AM, et al. Transcutaneous Electrical Stimulation (TENS) for Psychogenic Movement Disorders. *J Neuropsychiatry Clin Neurosci* 2011;**23**(2):141-148.
- [S48] Espay AJ, Edwards MJ, Oggioni GD, et al. Tremor retraining as therapeutic strategy in psychogenic (functional) tremor. *Parkinsonism Relat Disord* 2014;**20**(6):647-650.
- [S49] Reuber M, Burness C, Howlett S, et al. Tailored psychotherapy for patients with functional neurological symptoms: A pilot study. *J Psychosom Res* 2007;**63**(6):625-632.
- [S50] Barry JJ, Wittenberg D, Bullock KD, et al. Group therapy for patients with psychogenic nonepileptic seizures: a pilot study. *Epilepsy Behav* 2008;**13**(4):624-629.
- [S51] Aybek S, Hubschmid M, Mossinger C, et al. Early intervention for conversion disorder: neurologists and psychiatrists working together. *Acta Neuropsychiatr* 2013;**25**(1):52-56.
- [S52] Zaroff CM, Myers L, Barr WB, et al. Group psychoeducation as treatment for psychological nonepileptic seizures. *Epilepsy Behav* 2004;**5**(4):587-592.

- [S53] Kozłowska K., Chudleigh C., Cruz C., et al. Psychogenic non-epileptic seizures in children and adolescents: Part II - explanations to families, treatment, and group outcomes. *Clin Child Psychol Psychiatry* 2018;**23**(1):160-176.
- [S54] Duncan R, Anderson J, Cullen B, et al. Predictors of 6-month and 3-year outcomes after psychological intervention for psychogenic non epileptic seizures. *Seizure* 2016;**36**:22-26.
- [S55] Ashworth M. PSYCHLOPS—a psychometric outcome measure that is finding a niche. *Couns Psychother Res* 2007;**7**(4):201-202.
- [S56] Turner-Stokes L. Goal attainment scaling (GAS) in rehabilitation: a practical guide. *Clin Rehabil* 2009;**23**(4):362-370.
- [S57] Berk M, Ng F, Dodd S, et al. The validity of the CGI severity and improvement scales as measures of clinical effectiveness suitable for routine clinical use. *J Eval Clin Pract* 2008;**14**(6):979-983.
- [S58] Khan A, Khan S, Shankles E, et al. Relative sensitivity of the Montgomery-Asberg Depression Rating Scale, the Hamilton Depression rating scale and the Clinical Global Impressions rating scale in antidepressant clinical trials. *Int Clin Psychopharmacol* 2002;**17**(6):281-285.
- [S59] Hedges DW, Brown BL, Shwalb DA. A direct comparison of effect sizes from the clinical global impression-improvement scale to effect sizes from other rating scales in controlled trials of adult social anxiety disorder. *Hum Psychopharmacol Clin Exp* 2009;**24**(1):35-40.
- [S60] Forkmann T, Scherer A, Boecker M, et al. The clinical global impression scale and the influence of patient or staff perspective on outcome. *BMC Psychiatry* 2011;**11**(1):83.
- [S61] Leon AC, Shear MK, Klerman GL, et al. A comparison of symptom determinants of patient and clinician global ratings in patients with panic disorder and depression. *J Clin Psychopharmacol* 1993;.
- [S62] Haro J, Kamath S, Ochoa S, et al. The Clinical Global Impression–Schizophrenia scale: a simple instrument to measure the diversity of symptoms present in schizophrenia. *Acta Psychiatr Scand* 2003;**107**:16-23.
- [S63] Spearing MK, Post RM, Leverich GS, et al. Modification of the Clinical Global Impressions (CGI) Scale for use in bipolar illness (BP): the CGI-BP. *Psychiatry Res* 1997;**73**(3):159-171.
- [S64] Asadi-Pooya AA, Bahrami Z. Frequency of attacks in patients with psychogenic non-epileptic seizures. *Epileptic Disord* 2019;**21**(4):371-374.
- [S65] Kocalevent R, Hinz A, Brähler E. Standardization of a screening instrument (PHQ-15) for somatization syndromes in the general population. *BMC Psychiatry* 2013;**13**(1):91.
- [S66] van Ravesteijn H, Wittkamp K, Lucassen P, et al. Detecting somatoform disorders in primary care with the PHQ-15. *Ann Fam Med* 2009;**7**(3):232-238.
- [S67] Han C, Pae C, Patkar AA, et al. Psychometric properties of the Patient Health Questionnaire–15 (PHQ–15) for measuring the somatic symptoms of psychiatric outpatients. *Psychosomatics* 2009;**50**(6):580-585.
- [S68] Hyphantis T, Kroenke K, Papatheodorou E, et al. Validity of the Greek version of the PHQ 15-item Somatic Symptom Severity Scale in patients with chronic medical conditions and correlations with emergency department use and illness perceptions. *Compr Psychiatry* 2014;**55**(8):1950-1959.
- [S69] Johnston M, Pollard B, Hennessey P. Construct validation of the hospital anxiety and depression scale with clinical populations. *J Psychosom Res* 2000;**48**(6):579-584.

- [S70] Abiodun O. A validity study of the Hospital Anxiety and Depression Scale in general hospital units and a community sample in Nigeria. *B J Psych* 1994;**165**(5):669-672.
- [S71] Aydemir Ö, Guvenir T, Kuey L, et al. Validity and reliability of Turkish version of hospital anxiety and depression scale. *Turk Psikiyatri Derg* 1997;**8**(4):280-287.
- [S72] Bjelland I, Dahl AA, Haug TT, et al. The validity of the Hospital Anxiety and Depression Scale: an updated literature review. *J Psychosom Res* 2002;**52**(2):69-77.
- [S73] Terkawi AS, Tsang S, AlKahtani GJ, et al. Development and validation of Arabic version of the Hospital Anxiety and Depression Scale. *Saudi J Anaesth* 2017;**11**(Suppl 1):S11-S18.
- [S74] Wiglusz MS, Landowski J, Michalak L, et al. Validation of the Hospital Anxiety and Depression Scale in patients with epilepsy. *Epilepsy Behav* 2016;**58**:97-101.
- [S75] Kojima M, Furukawa TA, Takahashi H, et al. Cross-cultural validation of the Beck Depression Inventory-II in Japan. *Psychiatry Res* 2002;**110**(3):291-299.
- [S76] Beck AT, Steer RA, Carbin MG. Psychometric properties of the Beck Depression Inventory: Twenty-five years of evaluation. *Clin Psychol Rev* 1988;**8**(1):77-100.
- [S77] Steer RA, Ranieri WF, Beck AT, et al. Further evidence for the validity of the Beck Anxiety Inventory with psychiatric outpatients. *J Anxiety Disord* 1993;**7**(3):195-205.
- [S78] Wang Y, Gorenstein C. Psychometric properties of the Beck Depression Inventory-II: a comprehensive review. *Braz J Psychiatry* 2013;**35**(4):416-431.
- [S79] Nuevo R, Dunn G, Dowrick C, et al. Cross-cultural equivalence of the Beck Depression Inventory: A five-country analysis from the ODIN study. *J Affect Disord* 2009;**114**(1-3):156-162.
- [S80] Wagner AK, Gandek B, Aaronson NK, et al. Cross-cultural comparisons of the content of SF-36 translations across 10 countries: results from the IQOLA project. *J Clin Epidemiol* 1998;**51**(11):925-932.
- [S81] Aaronson NK, Muller M, Cohen PD, et al. Translation, validation, and norming of the Dutch language version of the SF-36 Health Survey in community and chronic disease populations. *J Clin Epidemiol* 1998;**51**(11):1055-1068.
- [S82] Brazier JE, Harper R, Jones NM, et al. Validating the SF-36 health survey questionnaire: new outcome measure for primary care. *BMJ* 1992;**305**(6846):160-164.
- [S83] Hunter RM, Baio G, Butt T, et al. An educational review of the statistical issues in analysing utility data for cost-utility analysis. *Pharmacoeconomics* 2015;**33**(4):355-366.
- [S84] Brazier J, Usherwood T, Harper R, et al. Deriving a preference-based single index from the UK SF-36 Health Survey. *J Clin Epidemiol* 1998;**51**(11):1115-1128.
- [S85] Choy EH, Mease PJ. Key symptom domains to be assessed in fibromyalgia (outcome measures in rheumatoid arthritis clinical trials). *Rheum Dis Clin North Am* 2009;**35**(2):329-337.
- [S86] Turk DC, Dworkin RH, Allen RR, et al. Core outcome domains for chronic pain clinical trials: IMMPACT recommendations. *Pain* 2003;**106**(3):337-345.
- [S87] Dworkin RH, Turk DC, Farrar JT, et al. Core outcome measures for chronic pain clinical trials: IMMPACT recommendations. *Pain* 2005;**113**(1-2):9-19.

[S88] Grieve S, Perez RSGM, Birckle F, et al. Recommendations for a first Core Outcome Measurement set for complex regional Pain syndrome Clinical sTudies (COMPACT). *Pain* 2017;**158**(6):1083-1090.

[S89] Rief W, Burton C, Frosthalm L, et al. Core Outcome Domains for Clinical Trials on Somatic Symptom Disorder, Bodily Distress Disorder, and Functional Somatic Syndromes: European Network on Somatic Symptom Disorders Recommendations. *Psychosom Med* 2017;**79**(9):1008-1015.
