# Supplementary figures and images for: Outcome measurement in functional neurological disorder: a systematic review and recommendations
Source: PubMed Central journal article supplement — J Neurol Neurosurg Psychiatry. 2020 Feb 28;91(6):638–49. doi: 10.1136/jnnp-2019-322180 (PMC7279198; doi:10.1136/jnnp-2019-322180), 2020-02-28

### Appendix I: PRISMA flow diagram – review of existing OMs for FND

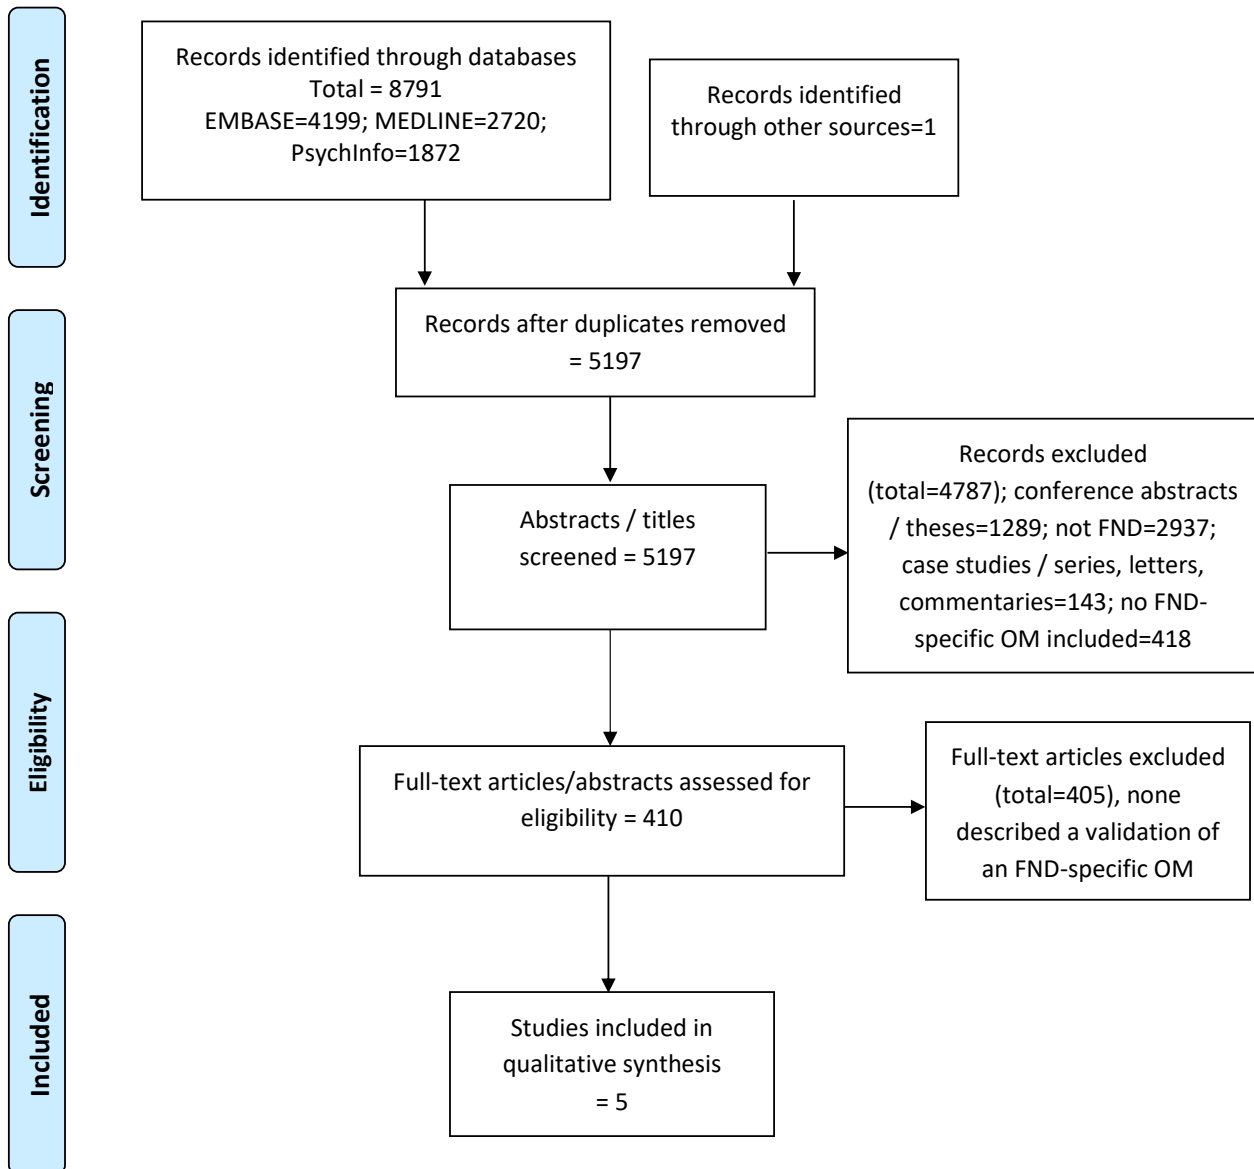

Supplement: jnnp-2019-322180supp002.pdf [file jnnp-2019-322180supp002.pdf]

## Appendix 2: PRISMA flow diagram – review of treatment studies in FND

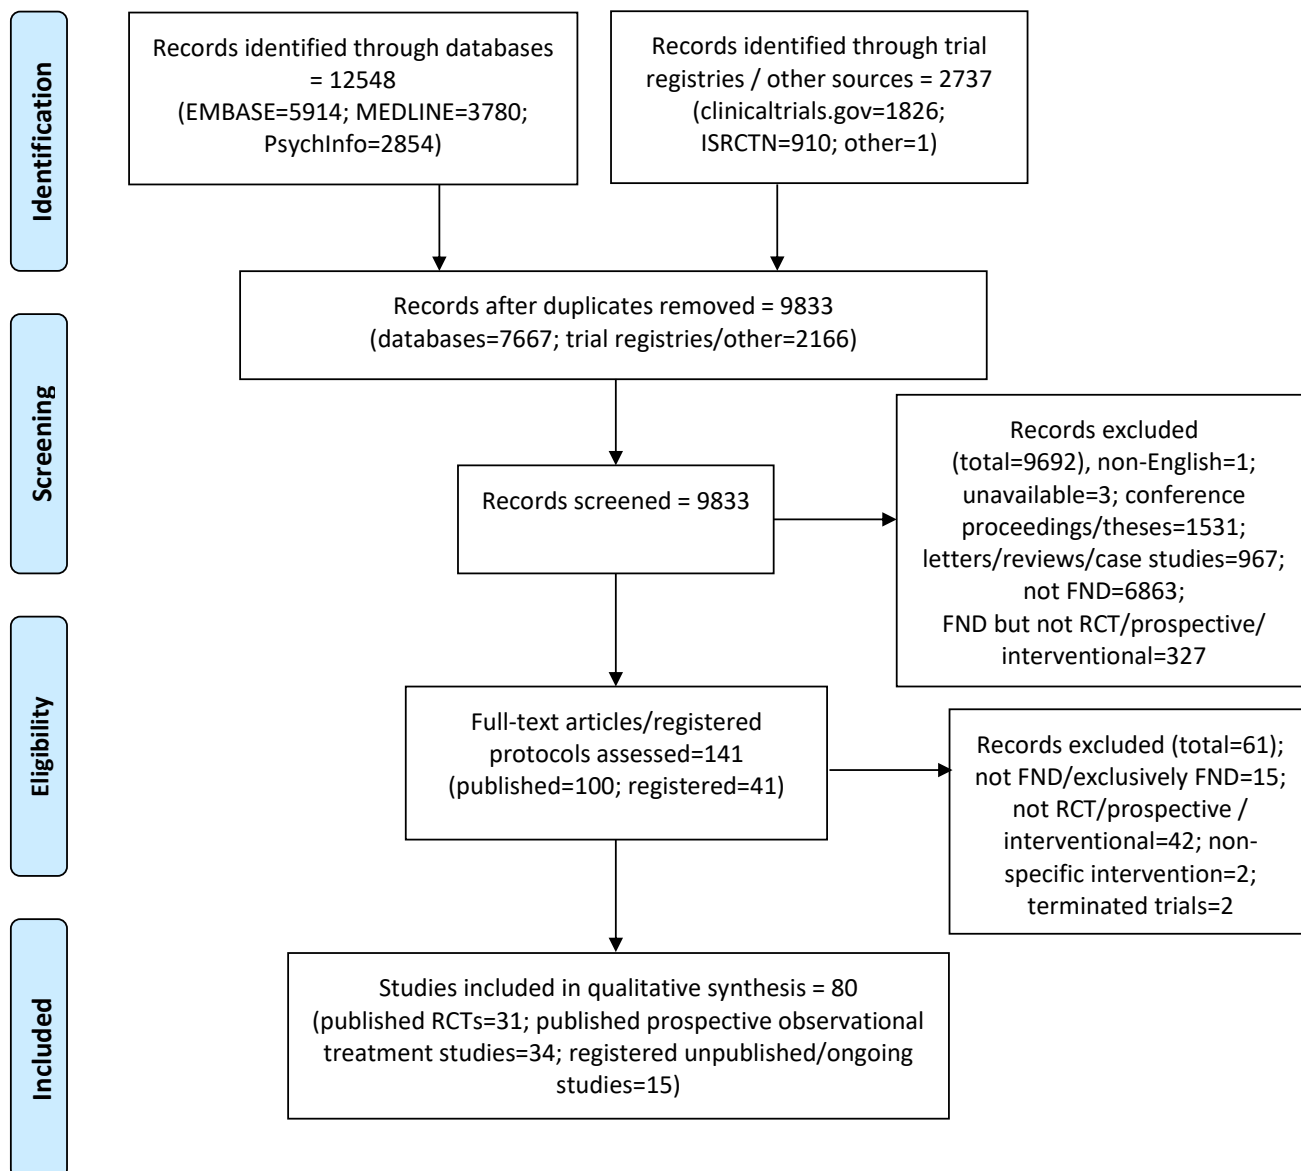

Supplement: jnnp-2019-322180supp004.pdf [file jnnp-2019-322180supp004.pdf]
